# Supplementary material for: Confidence Intervals for Population Allele Frequencies: The General Case of Sampling from a Finite Diploid Population of Any Size
Source: PubMed Central journal article supplement (PMC3897575; doi:10.1371/journal.pone.0085925), 2014-01-21
Supplement: pone.0085925.s001.pdf [file pone.0085925.s001.pdf]

## Supporting Information S1

### *Derivation of the variance of the sample allele frequency*

Consider a population of  $M$  diploid individuals, from which  $N$  individuals are randomly sampled. Let the locus of interest have  $n > 1$  alleles, denoted by  $A_i$ ,  $i \in \{1, 2, \dots, n\}$ . Also, let  $P_{ij}$  be the frequency of individuals in the population with alleles  $A_i$  and  $A_j$ , with  $i, j \in \{1, 2, \dots, n\}$ . Thus,  $MP_{ij}$  is the number of individuals in the population with alleles  $A_i$  and  $A_j$ . The frequency of allele  $A_i$  in the population is denoted by  $p_i$ , whereas that in the sample is denoted by  $p_{i,N}$  (a random variable).  $p_{i,N} = Y_{i,N} / (2N)$ , where  $Y_{i,N}$  is the number of copies of allele  $i$  in the sample of size  $N$ .  $Y_{i,N} = 2X_{ii} + \sum_{j=1, j \neq i}^n X_{ij}$ , where  $X_{ij}$  is the number of individuals in the sample with alleles  $A_i$  and  $A_j$ .  $Y_{i,N}$  can be written as  $Y_{i,N} = \sum_j a_j X_{ij}$ , where  $a_j = 2$  for  $i = j$  and  $a_j = 1$  for  $i \neq j$ . Using the formula for the variance of a sum of dependent variables, the variance of  $Y_{i,N}$  is equal to:

$$\sigma^2[Y_{i,N}] = \sum_j a_j^2 \sigma^2[X_{ij}] + \sum_{j \neq k} \sum_k a_j a_k \text{Cov}[X_{ij}, X_{ik}], \quad (\text{S1})$$

where  $\sigma^2$  and Cov denote the variance and covariance respectively. The  $X_{ij}$ 's, with  $i, j \in \{1, 2, \dots, n\}$ , follow a multivariate hypergeometric distribution with parameters  $M$ ,  $N$  and  $MP_{ij}$ . Thus,

$$\sigma^2[X_{ij}] = \left( \frac{M-N}{M-1} \right) NP_{ij} (1-P_{ij}), \quad (\text{S2})$$

and

$$\text{Cov}[X_{ij}, X_{ik}] = - \left( \frac{M-N}{M-1} \right) NP_{ij} P_{ik} \quad (\text{S3})$$

[1]. Thus,

$$\begin{aligned} \sigma^2[Y_{i,N}] &= \left( \frac{M-N}{M-1} \right) N \left( \sum_j a_j^2 P_{ij} (1-P_{ij}) - \sum_k \sum_{j \neq k} a_j a_k P_{ij} P_{ik} \right) \\ &= \left( \frac{M-N}{M-1} \right) N \left( a_i^2 P_{ii} (1-P_{ii}) + \sum_{j \neq i} a_j^2 P_{ij} (1-P_{ij}) - 2 \sum_{j \neq i} a_i a_j P_{ii} P_{ij} - \sum_{k \neq i} \sum_{j \neq i, k} a_j a_k P_{ij} P_{ik} \right) \\ &= \left( \frac{M-N}{M-1} \right) N \left( a_i^2 P_{ii} (1-P_{ii}) + \sum_{j \neq i} a_j^2 P_{ij} (1-P_{ij}) - 2 \sum_{j \neq i} a_i a_j P_{ii} P_{ij} - 2 \sum_{k \neq i} \sum_{j \neq i, k; j < k} a_j a_k P_{ij} P_{ik} \right) \end{aligned}$$

$$\begin{aligned}
&= \left( \frac{M-N}{M-1} \right) N \left( 4P_{ii}(1-P_{ii}) + \sum_{j \neq i} P_{ij}(1-P_{ij}) - 2 \sum_{j \neq i} (2P_{ii})P_{ij} - 2 \sum_{k \neq i} \sum_{j \neq i, k; j < k} P_{ij}P_{ik} \right) \\
&= \left( \frac{M-N}{M-1} \right) N \left( 4P_{ii} - (2P_{ii})^2 + \sum_{j \neq i} P_{ij} - \sum_{j \neq i} P_{ij}^2 - 2 \sum_{j \neq i} (2P_{ii})P_{ij} - 2 \sum_{k \neq i} \sum_{j \neq i, k; j < k} P_{ij}P_{ik} \right) \\
&= \left( \frac{M-N}{M-1} \right) N \left( \left( 2P_{ii} + \sum_{j \neq i} P_{ij} \right) - \left( (2P_{ii})^2 + \sum_{j \neq i} P_{ij}^2 + 2 \sum_{j \neq i} (2P_{ii})P_{ij} + 2 \sum_{k \neq i} \sum_{j \neq i, k; j < k} P_{ij}P_{ik} \right) + 2P_{ii} \right). \quad (S4)
\end{aligned}$$

$p_i = P_{ii} + \sum_{j=1, j \neq i}^n (P_{ij} / 2)$ , and thus  $2P_{ii} + \sum_{j \neq i} P_{ij} = 2p_i$ . In addition, using the multinomial series [2]:

$$(2p_i)^2 = \left( 2P_{ii} + \sum_{j \neq i} P_{ij} \right)^2 = (2P_{ii})^2 + \sum_{j \neq i} P_{ij}^2 + 2 \sum_{j \neq i} (2P_{ii})P_{ij} + 2 \sum_{k \neq i} \sum_{j \neq i, k; j < k} P_{ij}P_{ik}. \quad (S5)$$

Thus, (S4) can be simplified to

$$\sigma^2[Y_{i,N}] = \left( \frac{M-N}{M-1} \right) N (2p_i - 4p_i^2 + 2P_{ii}). \quad (S6)$$

Hence,

$$\sigma^2[p_{i,N}] = \frac{\sigma^2[Y_{i,N}]}{(2N)^2} = \frac{(M-N)(p_i - 2p_i^2 + P_{ii})}{2(M-1)N}, \quad (S7)$$

which is equivalent to equation (11).

### *References for Supporting Information S1*

1. Johnson NL, Kotz S, Balakrishnan N (1997) Discrete multivariate distributions. Hoboken, USA, Wiley-Blackwell. 328 p.
2. Weisstein, EW. "Multinomial Series." From MathWorld--A Wolfram Web Resource. <http://mathworld.wolfram.com/MultinomialSeries.html>
